# Supplementary material for: Halotolerant Bacillus altitudinis WR10 improves salt tolerance in wheat via a multi-level mechanism
Source: Frontiers journal article supplement (doi:10.3389/fpls.2022.941388), 2022-07-14
Supplement: Image_1.PDF [file Image_1.PDF]

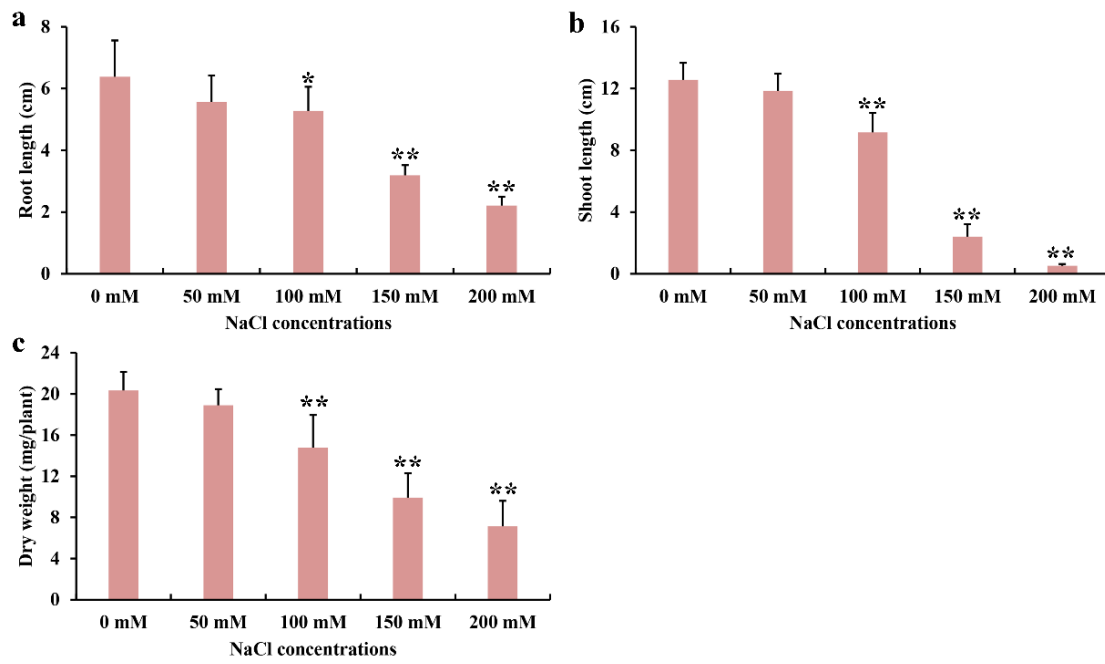

**FIGURE S1 The effect of NaCl on wheat growth.** (A) Root length; (B) Shoot length; (C) Plant dry weight. Seeds of Zhoumai 36 were grown in petri dishes containing 50-200 mM NaCl for 1 week.
