# Supplementary material for: Halotolerant Bacillus altitudinis WR10 improves salt tolerance in wheat via a multi-level mechanism
Source: Frontiers journal article supplement (doi:10.3389/fpls.2022.941388), 2022-07-14
Supplement: Image_2.PDF [file Image_2.PDF]

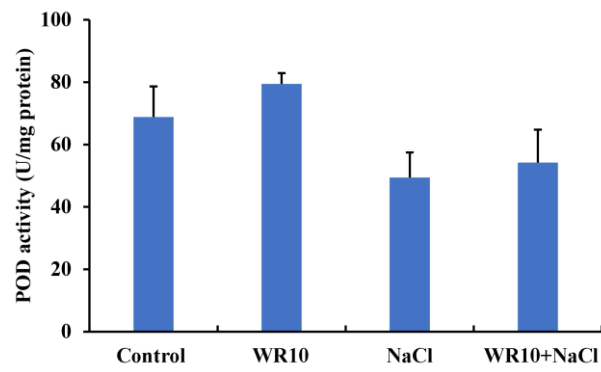

**FIGURE S2** POD activity in root of wheat seedlings with / without *Bacillus altitudinis* WR10 under salt stress.
